# Supplementary material for: Short-Term Estivation and Hibernation Induce Changes in the Blood and Circulating Hemocytes of the Apple Snail Pomacea canaliculata
Source: MDPI journal article supplement (doi:10.3390/metabo13020289), 2023-02-16

Article

# Short-term estivation and hibernation induce changes in the blood and circulating hemocytes of the apple snail *Pomacea canaliculata*

## Supplementary material.

**Figure S1:** DCF fluorescence in total circulating hemocytes. The upper histograms of DCF fluorescence were used to classify two subpopulations with different DCF intensity. Only the DCF<sup>+</sup> population was used for further statistical analysis. The lower histograms show examples of percent inhibition by CCCP. The statistical analysis is presented in Fig. 4 of the manuscript.

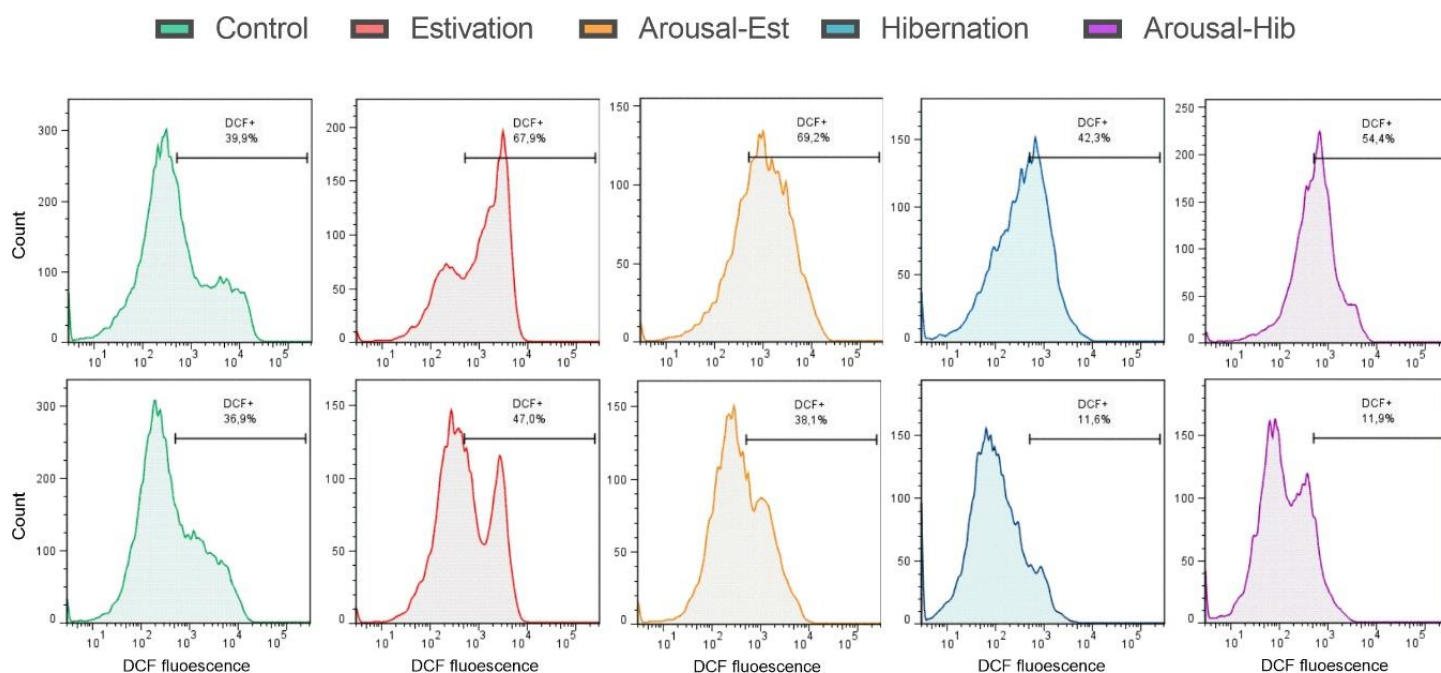

Supplement: s1 [file s1]
